# Supplementary material
Source: Preprints.org preprint supplement (doi:10.20944/preprints202004.0310.v3)
Supplement: Supplementary file 1 [file supplementary]

**Table S1. COVID-19 infections in the East Asian countries (April 17, 2020)<sup>‡</sup>**

|             | Total  | Death | IDR (%) | Recovered cases | Recovered cases (%) | Active cases | Closed cases | Closed cases (%) |
|-------------|--------|-------|---------|-----------------|---------------------|--------------|--------------|------------------|
| Japan       | 8,626  | 178   | 16.50   | 901             | 83.50               | 7,547        | 1,079        | 12.51            |
| China       | 82,341 | 3,342 | 4.11    | 77,892          | 95.89               | 1,107        | 81,234       | 98.66            |
| Taiwan      | 395    | 6     | 3.73    | 155             | 96.27               | 234          | 161          | 40.76            |
| Malaysia    | 5,182  | 84    | 2.95    | 2,766           | 97.05               | 2,332        | 2,850        | 55.00            |
| South Korea | 10,613 | 229   | 2.87    | 7,757           | 97.13               | 2,627        | 7,986        | 75.25            |
| Thailand    | 2,672  | 46    | 2.81    | 1,593           | 97.19               | 1,033        | 1,639        | 61.34            |
| Singapore   | 4,427  | 10    | 1.44    | 683             | 98.56               | 3,734        | 693          | 15.65            |
| Hong Kong   | 1,018  | 4     | 0.82    | 485             | 99.18               | 529          | 489          | 48.04            |
| Vietnam     | 268    |       | 0.00    | 177             | 100.00              | 91           | 177          | 66.04            |

Various countries with COVID-19 infections are sorted in descending order of their Interim Death Rates (%). Based on the IDRs various countries are grouped into two groups: 11-24% IDRs, greenish yellow; and below 10% IDRs, green.

<sup>‡</sup>Updated data was obtained from <https://www.worldometers.info/coronavirus/>.

**Table S2. COVID-19 infections in the Middle East countries (April 17, 2020)<sup>‡</sup>**

|              | Total  | Death | IDR (%) | Recovered cases | Recovered cases (%) | Active cases | Closed cases | Closed cases (%) |
|--------------|--------|-------|---------|-----------------|---------------------|--------------|--------------|------------------|
| Iraq         | 1,434  | 80    | 8.55    | 856             | 91.45               | 498          | 936          | 65.27            |
| Iran         | 77,995 | 4,869 | 8.53    | 52,229          | 91.47               | 20,897       | 57,098       | 73.21            |
| Saudi Arabia | 6,380  | 83    | 7.74    | 990             | 92.26               | 5,307        | 1,073        | 16.82            |
| Israel       | 12,758 | 142   | 4.80    | 2,818           | 95.20               | 9,798        | 2,960        | 23.20            |
| UAE          | 5,825  | 35    | 3.10    | 1,095           | 96.90               | 4,695        | 1,130        | 19.40            |
| Palestine    | 374    | 2     | 3.08    | 63              | 96.92               | 309          | 65           | 17.38            |
| Jordan       | 402    | 7     | 2.63    | 259             | 97.37               | 136          | 266          | 66.17            |
| Oman         | 1,019  | 4     | 2.22    | 176             | 97.78               | 839          | 180          | 17.66            |
| Qatar        | 4,103  | 7     | 1.66    | 415             | 98.34               | 3,681        | 422          | 10.29            |
| Kuwait       | 1,524  | 3     | 1.32    | 225             | 98.68               | 1,296        | 228          | 14.96            |
| Bahrain      | 1,700  | 7     | 0.99    | 703             | 99.01               | 990          | 710          | 41.76            |

Various countries with COVID-19 infections are sorted in descending order of their Interim Death Rates (%). Based on the IDRs all countries are grouped in one group of below 10% IDRs, green.

<sup>‡</sup>Updated data was obtained from <https://www.worldometers.info/coronavirus/>.

**Table S3. COVID-19 infections in the Western Europe (April 17, 2020)‡**

|             | Total   | Death  | IDR (%) | Recovered cases | Recovered cases (%) | Active cases | Closed cases | Closed cases (%) |
|-------------|---------|--------|---------|-----------------|---------------------|--------------|--------------|------------------|
| UK          | 103,093 | 13,729 | 97.56   | 344             | 2.44                | 89,020       | 14,073       | 13.65            |
| Netherlands | 29,214  | 3,315  | 92.99   | 250             | 7.01                | 25,649       | 3,565        | 12.20            |
| Ireland     | 13,271  | 486    | 86.32   | 77              | 13.68               | 12,708       | 563          | 4.24             |
| Norway      | 6,848   | 152    | 82.61   | 32              | 17.39               | 6,664        | 184          | 2.69             |
| Sweden      | 12,540  | 1,333  | 70.79   | 550             | 29.21               | 10,657       | 1,883        | 15.02            |
| Portugal    | 18,841  | 629    | 56.06   | 493             | 43.94               | 17,719       | 1,122        | 5.96             |
| Belgium     | 34,809  | 4,857  | 39.11   | 7,562           | 60.89               | 22,390       | 12,419       | 35.68            |
| Italy       | 168,941 | 22,170 | 35.57   | 40,164          | 64.43               | 106,607      | 62,334       | 36.90            |
| France      | 165,027 | 17,920 | 35.32   | 32,812          | 64.68               | 114,295      | 50,732       | 30.74            |
| Spain       | 182,816 | 19,130 | 20.37   | 74,797          | 79.63               | 88,889       | 93,927       | 51.38            |
| Denmark     | 6,879   | 321    | 9.60    | 3,023           | 90.40               | 3,535        | 3,344        | 48.61            |
| Switzerland | 26,732  | 1,281  | 7.46    | 15,900          | 92.54               | 9,551        | 17,181       | 64.27            |
| Germany     | 136,569 | 3,943  | 4.87    | 77,000          | 95.13               | 55,626       | 80,943       | 59.27            |
| Austria     | 14,475  | 410    | 4.36    | 8,986           | 95.64               | 5,079        | 9,396        | 64.91            |
| Finland     | 3,369   | 75     | 4.23    | 1,700           | 95.77               | 1,594        | 1,775        | 52.69            |
| Iceland     | 1,739   | 8      | 0.69    | 1,144           | 99.31               | 587          | 1,152        | 66.24            |

Various countries with COVID-19 infections are sorted in descending order of their Interim Death Rates (%). Based on the IDRs various countries are grouped into five groups: higher than 80% IDRs, red; 51-79% IDRs, brown; 25-50% IDRs, dark yellow; 11-24% IDRs, greenish yellow; and below 10% IDRs, green.

‡Updated data was obtained from <https://www.worldometers.info/coronavirus/>.

**Table S4. COVID-19 infections in the US (April 17, 2020)†**

|                | Total   | Death  | IDR (%) | Recovered cases | Recovered cases (%) | Active cases | Closed cases | Closed cases (%) | German Ancestry* |
|----------------|---------|--------|---------|-----------------|---------------------|--------------|--------------|------------------|------------------|
| USA            | 670,598 | 34,233 | 37.43   | 57,232          | 62.57               | 579,133      | 91,465       | 13.64            |                  |
| <b>States</b>  |         |        |         |                 |                     |              |              |                  |                  |
| South Carolina | 3,656   | 107    | 100.00  | 0               | 0.00                | 3,549        | 107          | 2.93             | 10.0             |
| Mississippi    | 3,624   | 129    | 100.00  | 0               | 0.00                | 3,495        | 129          | 3.56             | 5.3              |
| Oregon         | 1,736   | 64     | 100.00  | 0               | 0.00                | 1,672        | 64           | 3.69             | 19.1             |
| Vermont        | 768     | 35     | 100.00  | 0               | 0.00                | 733          | 35           | 4.56             | 10.5             |
| Indiana        | 9,542   | 477    | 97.15   | 14              | 2.85                | 9,051        | 491          | 5.15             | 23.0             |
| Louisiana      | 22,532  | 1,156  | 95.85   | 50              | 4.15                | 21,326       | 1,206        | 5.35             | 7.5              |
| Illinois       | 25,733  | 1,072  | 95.54   | 50              | 4.46                | 24,611       | 1,122        | 4.36             | 18.6             |
| Georgia        | 15,669  | 587    | 94.98   | 31              | 5.02                | 15,051       | 618          | 3.94             | 7.0              |
| Connecticut    | 14,755  | 868    | 93.03   | 65              | 6.97                | 13,822       | 933          | 6.32             | 9.0              |
| Rhode Island   | 3,838   | 105    | 91.30   | 10              | 8.70                | 3,723        | 115          | 3.00             | 5.4              |
| Alabama        | 4,345   | 133    | 86.93   | 20              | 13.07               | 4,192        | 153          | 3.52             | 6.8              |
| Michigan       | 29,263  | 2,093  | 82.53   | 443             | 17.47               | 26,727       | 2,536        | 8.67             | 20.3             |
| Ohio           | 8,414   | 389    | 76.42   | 120             | 23.58               | 7,905        | 509          | 6.05             | 25.6             |
| New Jersey     | 75,317  | 3,518  | 73.46   | 1,271           | 26.54               | 70,528       | 4,789        | 6.36             | 10.6             |
| Wisconsin      | 3,875   | 197    | 69.37   | 87              | 30.63               | 3,591        | 284          | 7.33             | 40.5             |
| Arizona        | 4,234   | 150    | 68.18   | 70              | 31.82               | 4,014        | 220          | 5.20             | 13.7             |
| Idaho          | 1,587   | 41     | 63.08   | 24              | 36.92               | 1,522        | 65           | 4.10             | 17.5             |
| Pennsylvania   | 27,735  | 779    | 54.51   | 650             | 45.49               | 26,306       | 1,429        | 5.15             | 25.1             |
| Florida        | 22,897  | 633    | 49.57   | 644             | 50.43               | 21,620       | 1,277        | 5.58             | 10.0             |
| Nebraska       | 952     | 21     | 48.84   | 22              | 51.16               | 909          | 43           | 4.52             | 36.1             |
| Missouri       | 5,111   | 159    | 46.36   | 184             | 53.64               | 4,768        | 343          | 6.71             | 24.2             |
| Colorado       | 8,280   | 357    | 41.75   | 498             | 58.25               | 7,425        | 855          | 10.33            | 20.3             |
| New York       | 226,343 | 16,251 | 40.49   | 23,887          | 59.51               | 186,205      | 40,138       | 17.73            | 11.1             |
| California     | 27,238  | 897    | 39.92   | 1,350           | 60.08               | 24,991       | 2,247        | 8.25             | 8.1              |
| Maryland       | 10,784  | 392    | 34.75   | 736             | 65.25               | 9,656        | 1,128        | 10.46            | 13.8             |
| Kentucky       | 2,291   | 122    | 28.50   | 306             | 71.50               | 1,863        | 428          | 18.68            | 14.4             |
| Washington     | 10,910  | 567    | 27.73   | 1,478           | 72.27               | 8,865        | 2,045        | 18.74            | 17.8             |
| Kansas         | 1,588   | 80     | 25.00   | 240             | 75.00               | 1,268        | 320          | 20.15            | 27.2             |

|                      |        |       |        |       |       |        |       |       |      |
|----------------------|--------|-------|--------|-------|-------|--------|-------|-------|------|
| Virginia             | 6,889  | 208   | 17.95  | 951   | 82.05 | 5,730  | 1,159 | 16.82 | 11.5 |
| North Carolina       | 5,553  | 139   | 13.60  | 883   | 86.40 | 4,531  | 1,022 | 18.40 | 10.4 |
| Massachusetts        | 32,181 | 1,245 | 13.30  | 8,118 | 86.70 | 22,818 | 9,363 | 29.09 | 6.0  |
| District of Columbia | 2,350  | 81    | 12.80  | 552   | 87.20 | 1,717  | 633   | 26.94 | ND   |
| Delaware             | 2,014  | 46    | 11.50  | 354   | 88.50 | 1,614  | 400   | 19.86 | 13.5 |
| New Mexico           | 1,484  | 36    | 10.88  | 295   | 89.12 | 1,153  | 331   | 22.30 | 8.8  |
| Nevada               | 3,321  | 137   | 10.49  | 1,169 | 89.51 | 2,015  | 1,306 | 39.33 | 11.3 |
| Oklahoma             | 2,357  | 131   | 10.19  | 1,155 | 89.81 | 1,071  | 1,286 | 54.56 | 13.7 |
| Texas                | 16,455 | 393   | 9.66   | 3,677 | 90.34 | 12,385 | 4,070 | 24.73 | 9.6  |
| Utah                 | 2,683  | 21    | 8.79   | 218   | 91.21 | 2,444  | 239   | 8.91  | 11.2 |
| Minnesota            | 1,912  | 94    | 8.44   | 1,020 | 91.56 | 798    | 1,114 | 58.26 | 33.8 |
| New Hampshire        | 1,139  | 32    | 8.06   | 365   | 91.94 | 742    | 397   | 34.86 | 9.0  |
| Alaska               | 300    | 9     | 7.56   | 110   | 92.44 | 181    | 119   | 39.67 | 15.6 |
| West Virginia        | 723    | 12    | 7.55   | 147   | 92.45 | 564    | 159   | 21.99 | 17.6 |
| Maine                | 796    | 27    | 7.50   | 333   | 92.50 | 436    | 360   | 45.23 | 8.1  |
| Iowa                 | 2,141  | 60    | 7.49   | 741   | 92.51 | 1,340  | 801   | 37.41 | 35.1 |
| Arkansas             | 1,620  | 37    | 6.32   | 548   | 93.68 | 1,035  | 585   | 36.11 | 10.7 |
| Tennessee            | 6,262  | 141   | 6.03   | 2,196 | 93.97 | 3,925  | 2,337 | 37.32 | 9.7  |
| North Dakota         | 393    | 9     | 5.23   | 163   | 94.77 | 221    | 172   | 43.77 | 41.4 |
| Montana              | 415    | 7     | 3.11   | 218   | 96.89 | 190    | 225   | 54.22 | 26.0 |
| Hawaii               | 530    | 9     | 2.45   | 359   | 97.55 | 162    | 368   | 69.43 | 5.9  |
| South Dakota         | 1,311  | 7     | 1.84   | 373   | 98.16 | 931    | 380   | 28.99 | 38.8 |
| Wyoming              | 288    | 2     | 1.12   | 176   | 98.88 | 110    | 178   | 61.81 | 23.6 |
| South Carolina       | 3,656  | 107   | 100.00 | 0     | 0.00  | 3,549  | 107   | 2.93  | 10.0 |

Various countries with COVID-19 infections in descending order of their Interim Death Rates (%). Based on the IDRs various states are grouped into five groups: higher than 80% IDRs, red; 51-79% IDRs, brown; 25-50% IDRs, dark yellow; 11-24% IDRs, greenish yellow; and below 10% IDRs, green.

‡Updated data was obtained from <https://www.worldometers.info/coronavirus/>.

\*The data on German and East Asian (not shown) ancestry of population in various US states were obtained from <https://statisticalatlas.com/state/STATE/Ancestry>.
